# Supplementary material for: Functional Analysis of the Major Pilin Proteins of Type IV Pili in Streptococcus sanguinis CGMH010
Source: MDPI journal article supplement (doi:10.3390/ijms25105402), 2024-05-15
Supplement: s1 [file s1]

**Table S1.** Primers used in this study.

| Primer                           | Sequences <sup>c</sup>               | Purpose                                |
|----------------------------------|--------------------------------------|----------------------------------------|
| PilA1-BamHI-S                    | CGCGGGATCCGCGATTCCAGCTATTACTTC       | Construction of pET28a/ <i>pilA1</i>   |
| PilA1-XhoI-AS                    | CGCGCTCGAGAGTTCTTATTAACCCCGTTTG      |                                        |
| PilA2-BamHI-S                    | CGCGGGATCCGCGGTTCCGGCTCTCACTTC       | Construction of pET28a/ <i>pilA2</i>   |
| PilA2-XhoI-AS                    | CGCGCTCGAGAGTTGGTATTTGAACCACTAT      |                                        |
| PilA3-BamHI-S                    | CGCGGGATCCGCGATTCCAGCTATCACTTC       | Construction of pET28a/ <i>pilA3</i>   |
| PilA3-XhoI-AS                    | CGCGCTCGAGAATTTTTATTAACTCCATTTG      |                                        |
| PilA1-501-S <sup>a</sup>         | TGGTGCAGGCCGGTGAAAAG                 | Construction of strain $\Delta pilA1$  |
| PilA1-1506-BamHI-AS <sup>a</sup> | CGCGGGATCCTAACATTTTGAATAGATCTCCTATT  |                                        |
| PilA1-1936-XbaI-S                | CGCGTCTAGAAAGAACTAACGCAAATCATCAAATC  |                                        |
| PilA1-2944-AS                    | GGGTTGTACCACTAATAGTATGTGC            |                                        |
| PilA2-1052-S                     | CGTCTGACAGGGATGATTAC                 | Construction of strain $\Delta pilA2$  |
| PilA2-2057-BamHI-AS              | CGCGGGATCCTCGCACTAACTTCTCCTAATTC     |                                        |
| PilA2-2502-XbaI-S <sup>a</sup>   | CGCGTCTAGAACCAACTAGCTAAATGTAGTTTAAA  |                                        |
| PilA2-3507-AS <sup>a</sup>       | CCGTCAAACCTTTCCTGTCAT                |                                        |
| PilA3-1587-S <sup>b</sup>        | CATTATCGCTATCATTGCAGCTGTA            | Construction of strain $\Delta pilA3$  |
| PilA3-2589-BamHI-AS              | CGCGGGATCCTAACATTTAAATATTCTCCTATTTT  |                                        |
| PilA3-3022-XbaI-S <sup>a</sup>   | CGCGTCTAGAAAAAATTAATAGACTGCAGAATTAA  |                                        |
| PilA3-4024-AS <sup>a,b</sup>     | GTTCTAACTCACTAACATTCCAGT             |                                        |
| NP-erm-BamHI-S                   | AATGGATCCTTAAGAAGGAGTGATTACATG       | Amplification of <i>erm</i>            |
| NP-erm-XbaI-AS                   | CGATCTAGACTATTATTTCTCCCGTTAAA        |                                        |
| PilA3-2589-NdeI-AS               | CGCGCATATGTAACATTTAAATATTCTCCTATTTT- | Construction of strain $\Delta pilA13$ |
| Non-Km-XbaI-AS                   | TTTCTAGAGTACTAAAACAATTCATCCAGTAAAA-  |                                        |
| Non-polar-Km-S-NdeI              | TTCATATGGGAAGGAAATAATAAATGGCTAAAATG- |                                        |

<sup>a</sup>, also used in the construction of  $\Delta pilA12$  and  $\Delta pilA123$

<sup>b</sup>, also used in the construction of  $\Delta pilA13$

<sup>c</sup>, Restriction endonuclease recognition sequences are underlined.

Figure S1

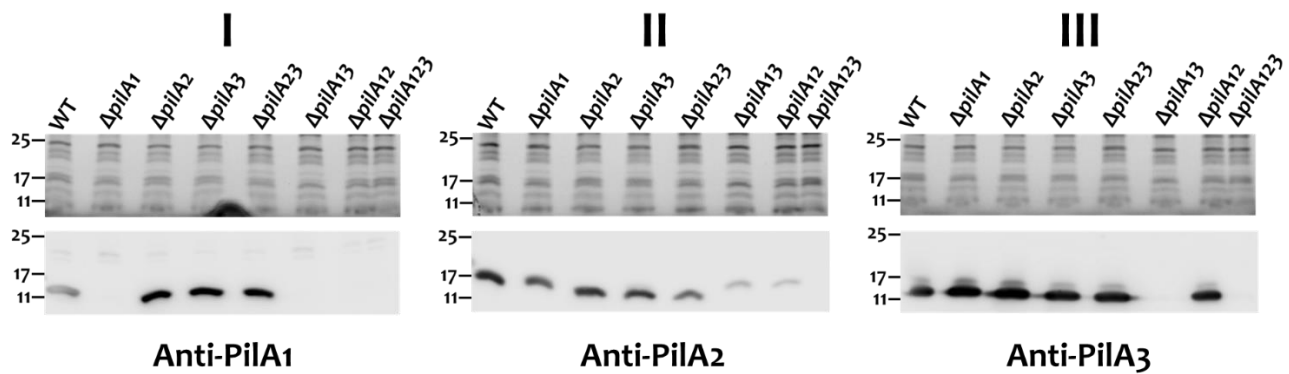

**Figure S1.** The expression of PilA proteins in *S. sanguinis* CGMH010 and its *pilA*-deletion derivatives. 20  $\mu$ g of total cell lysate from each strain was separated on 12% SDS-PAGE gels prepared using the TGX Stain-Free system (top images) and analyzed by western analysis (bottom images). The strains are indicated above the gel images. Antisera used for each blot are listed below the blot. The molecular weight in kDa is shown to the left of both the gel and the blot. WT, wild-type *S. sanguinis* CGMH010.
